# Supplementary material for: Height dependent molecular trapping in stacked cyclic porphyrin nanorings
Source: Royal Society of Chemistry journal article supplement (doi:10.1039/c4cc02629b), 2014-01-01
Supplement: c4cc02629b1.pdf [file c4cc02629b1.pdf]

## Electronic Supplementary Information

### Height dependent molecular trapping in stacked cyclic porphyrin nanorings

Maria B. Wieland,<sup>a</sup> Luis M. A. Perdigão,<sup>a</sup> Dmitry V. Kondratuk,<sup>b</sup> James N. O'Shea,<sup>a</sup> Harry L. Anderson<sup>b</sup> and Peter H. Beton<sup>a</sup>

<sup>a</sup> School of Physics and Astronomy, University of Nottingham, Nottingham, NG7 2RD, UK.

<sup>b</sup> Department of Chemistry, University of Oxford, Chemistry Research Laboratory, Oxford, OX1 3TA, UK.

#### Sample Preparation and Electrospray Deposition

Porphyrin nanorings c-P12 and c-P24 with octyloxy- sidechains were synthesised and purified as reported recently [M. C. O'Sullivan, et al., Nature 2011, 469, 72 and D. V. Kondratuk, et al., Angew. Chem. Int. Ed. 2012, 51, 6696]. A solution containing the dissolved nanorings was prepared with a concentration of 100 µg/mL in a methanol:toluene mixture (1:3 by volume). The solution was passed at a flow rate of ~10 µL/min through a stainless steel emitter held at ~1.8 kV under atmospheric conditions. The highly directional jet of droplets then enters the vacuum system via a narrow capillary tube, and then passes through differentially pumped chambers before impinging on the gold substrate. A system provided commercially by MolecularSpray is used for these experiments. During the deposition the pressure in the preparation chamber rises to the high 10<sup>-6</sup> mbar range. C<sub>60</sub> (supplied commercially by Sigma Aldrich) is deposited from a Knudsen cell at 1 nm/min.

The Au(111) on mica sample (thickness 300 nm; supplied commercially by Georg Albert Physical-vapour deposition) was cleaned before deposition by Ar-sputtering for 30 min at 0.8 keV and 10<sup>-5</sup> mbar Ar-pressure, followed by annealing at 400 °C for 1 hour using a piece of highly doped silicon under the gold/mica sample as a heater. The sputter-anneal-cycle is repeated until the herringbone reconstruction is clearly observed in images acquired using a scanning tunnelling microscope (STM). STM images were acquired at room temperature using electrochemically etched tungsten tips in constant current mode.
